# Supplementary material for: Monitoring the Growth of an Orthotopic Tumour Xenograft Model: Multi-Modal Imaging Assessment with Benchtop MRI (1T), High-Field MRI (9.4T), Ultrasound and Bioluminescence
Source: PLoS One. 2016 May 25;11(5):e0156162. doi: 10.1371/journal.pone.0156162 (PMC4880291; doi:10.1371/journal.pone.0156162)
Supplement: S1 Table — (XLSX) [file pone.0156162.s002.xlsx]

## Sheet: Volumes
9.4T MRI				1T MRI				US				BLI
		Burden (%)				Burden (%)				Burden (%)				Flux Density (p/s/cm2/str)
Day 8	M1	0		Day 7	M1	0		Day 2	M1	0.16783		Day 2	M1	1.01504e+08
Day 8	M2	0		Day 7	M2	0		Day 2	M2	0		Day 2	M2	1.06646e+07
Day 8	M3	0		Day 7	M3	0		Day 2	M3	1.91554		Day 2	M3	8.15718e+06
Day 8	M4	0.0856714		Day 7	M4	0		Day 2	M4	1.26711		Day 2	M4	7.08185e+07
Day 8	M5	0		Day 7	M5	0.221147		Day 2	M5	0.452966		Day 2	M5	1.63348e+07
Day 8	M6	0		Day 7	M6	0		Day 2	M6	0		Day 2	M6	1.73551e+06
Day 8	M7	0		Day 7	M7	0		Day 2	M7	0		Day 2	M7	2.87665e+07
Day 8	M8	0		Day 7	M8	0		Day 2	M8	0.930522		Day 2	M8	1.45696e+07
Day 14	M1	0		Day 15	M1	0		Day 9	M1	0		Day 9	M1	3.70329e+07
Day 14	M2	1.60012		Day 15	M2	0		Day 9	M2	0		Day 9	M2	4.04416e+07
Day 14	M3	7.24817		Day 15	M3	0		Day 9	M3	6.43095		Day 9	M3	1.11218e+08
Day 14	M4	2.05503		Day 15	M4	1.06971		Day 9	M4	0		Day 9	M4	2.81751e+07
Day 14	M5	15.8167		Day 15	M5	8.65469		Day 9	M5	0		Day 9	M5	3.81436e+07
Day 14	M6	0		Day 15	M6	0.256792		Day 9	M6	0		Day 9	M6	4.29669e+06
Day 14	M7	0.12362		Day 15	M7	0		Day 9	M7	0		Day 9	M7	1.58406e+07
Day 14	M8	1.62817		Day 15	M8	0		Day 9	M8	0		Day 9	M8	1.06863e+07
Day 20	M1	0.137994		Day 21	M1	0		Day 16	M1	0.672653		Day 20	M1	2.54635e+08
Day 20	M2	16.575		Day 21	M2	1.64947		Day 16	M2	3.98095		Day 20	M2	1.62935e+09
Day 20	M3	54.2991		Day 21	M3	37		Day 16	M3	24.929		Day 20	M3	3.82977e+09
Day 20	M4	19.48		Day 21	M4	11.3793		Day 16	M4	5.05682		Day 20	M4	1.36329e+09
Day 20	M5	38.0298		Day 21	M5	39.9982		Day 16	M5	15.9382		Day 20	M5	2.57328e+09
Day 20	M6	1.51474		Day 21	M6	1.66759		Day 16	M6	0		Day 20	M6	8.17899e+07
Day 20	M7	4.17088		Day 21	M7	5.1376		Day 16	M7	1.38181		Day 20	M7	6.95896e+08
Day 20	M8	4.70834		Day 21	M8	3.99708		Day 16	M8	1.71821		Day 20	M8	8.67583e+08
Day 27	M1	0.607248		Day 28	M1	3.90258		Day 23	M1	4.60059		Day 23	M1	2.5903e+08
Day 27	M2	19.9281		Day 28	M2	22.4287		Day 23	M2	31.5591		Day 23	M2	1.48481e+09
Day 27	M4	58.9428		Day 28	M4	62.0325		Day 23	M3	42.998		Day 23	M3	4.76288e+09
Day 27	M6	0		Day 28	M6	5.94181		Day 23	M4	28.8259		Day 23	M4	1.58801e+09
Day 27	M7	21.0182		Day 28	M7	47.407		Day 23	M5	75.5253		Day 23	M5	2.58324e+09
								Day 23	M6	0		Day 23	M6	5.84212e+07
								Day 23	M7	18.9039		Day 23	M7	5.53937e+08
								Day 23	M8	17.5946		Day 23	M8	1.06205e+09
